# Supplementary material for: Hepatic IRS1 and ß-catenin expression is associated with histological progression and overt diabetes emergence in NAFLD patients
Source: PubMed Central journal article supplement (PMC6244858; doi:10.1007/s00535-018-1472-0), 2018-05-10

# Supplementary Figure 2

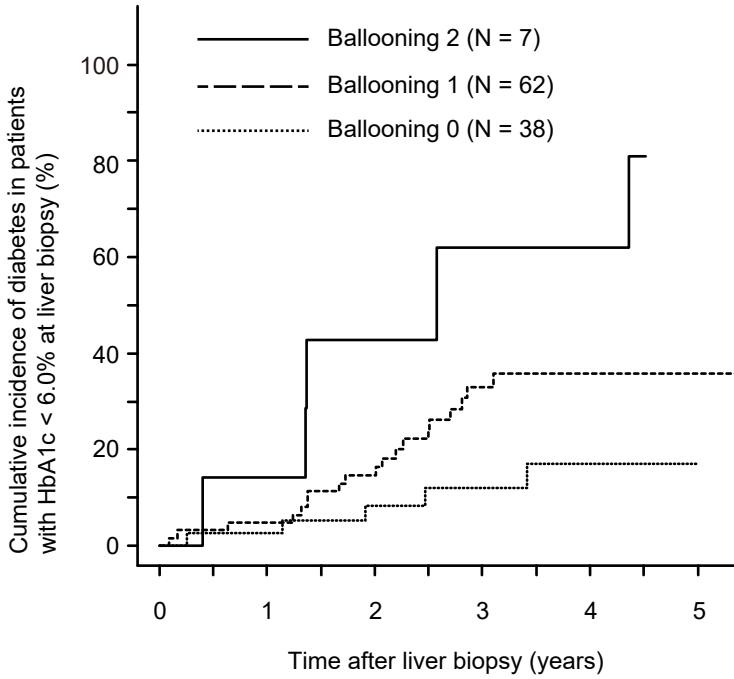

Supplement: 535_2018_1472_MOESM2_ESM.pdf [file 535_2018_1472_MOESM2_ESM.pdf]
